# Supplementary material for: Nitrogen Loss and Migration in Rice Fields under Different Water and Fertilizer Modes
Source: MDPI journal article supplement (doi:10.3390/plants13050562), 2024-02-20
Supplement: s1 [file s1]

**Table S2.** Division of each birth period and fertilizer application amount

| Regreening      |                               |            |                  | Early<br>-<br>tilleri<br>ng | Late-<br>tillerin<br>g | Jointi<br>ng  | Heading-flow<br>ering | Milky<br>ripeni<br>ng | Yellow<br>ripenin<br>g |
|-----------------|-------------------------------|------------|------------------|-----------------------------|------------------------|---------------|-----------------------|-----------------------|------------------------|
| Date            | 6.27-7.6                      |            |                  | 7.7-8.<br>6                 | 8.7-8.1<br>0           | 8.11-8.<br>23 | 8.24-9.16             | 9.17-10.<br>10        | 10.11-10<br>.23        |
| Fertilizer<br>1 | P <sub>2</sub> O <sub>5</sub> | N          | K <sub>2</sub> O | N                           |                        |               | N                     | K <sub>2</sub> O      |                        |
| NF              | 101.<br>94                    | 101.9<br>4 | 85.63            | 76.44                       |                        |               | 76.44                 | 36.69                 |                        |
| C-80            | 81.5<br>5                     | 81.55      | 68.50            | 61.15                       |                        |               | 61.15                 | 29.35                 |                        |

<sup>1</sup> The unit of fertilizer application is kg/hm<sup>2</sup>.
