# Supplementary material for: Nitrogen Loss and Migration in Rice Fields under Different Water and Fertilizer Modes
Source: MDPI journal article supplement (doi:10.3390/plants13050562), 2024-02-20
Supplement: s1 [file s1]

**Table S1.** Water control criteria for different irrigation modes

| Irrigation and drainage mode | Water management metric         | Regreen-ing stage | Earlier tillering stage | Later tillering stage        | Jointing-booting stage | Heading-flowering stage | Milky ripening stage | Yellow ripening stage |
|------------------------------|---------------------------------|-------------------|-------------------------|------------------------------|------------------------|-------------------------|----------------------|-----------------------|
| FSI                          | Lower limit of irrigation       | 10 <sup>1</sup>   | 10                      | 70 % $\theta_s$ <sup>2</sup> | 10                     | 10                      | 10                   |                       |
|                              | The upper limit of irrigation   | 30                | 60                      | 0                            | 70                     | 60                      | 40                   | Natural dry           |
|                              | The upper limit of rain storage | 40                | 90                      | 0                            | 90                     | 90                      | 60                   |                       |
| II                           | Lower limit of irrigation       | 10                | 80 % $\theta_s$         | 70 % $\theta_s$              | 80 % $\theta_s$        | 80 % $\theta_s$         | 80 % $\theta_s$      |                       |
|                              | The upper limit of irrigation   | 30                | 50                      | 0                            | 60                     | 50                      | 40                   | Natural dry           |
|                              | The upper limit of rain storage | 40                | 80                      | 0                            | 80                     | 80                      | 60                   |                       |

<sup>1</sup> The number unit in the table is "mm" indicates the field water depth, and <sup>2</sup>  $\theta_s$  indicates the percentage of 20 cm soil saturated moisture. If the soil moisture content or the water depth reaches the lower limit of irrigation, fill the water to the upper limit of the irrigation, drain the water to the upper limit.
