# Supplementary material for: Nitrogen Loss and Migration in Rice Fields under Different Water and Fertilizer Modes
Source: MDPI journal article supplement (doi:10.3390/plants13050562), 2024-02-20
Supplement: s1 [file s1]

Table S4. Loss load of nitrogen

| Nitrogen form                   | Treatment | Loss load of nitrogen     |               |                  |                   |               | Amount       |
|---------------------------------|-----------|---------------------------|---------------|------------------|-------------------|---------------|--------------|
|                                 |           | Regreening                | Tillering     | Jointing-booting | Hrading-flowering | Milky-ripping |              |
| TN                              | FW        | 0.248±0.086b <sup>1</sup> | 0.979±0.158b  | 0.553±0.122a     | 0.418±0.111b      | 0.501±0.122a  | 2.699±0.238a |
|                                 | FA        | 0.288±0.063a              | 1.105±0.233a  | 0.370±0.026b     | 0.484±0.068a      | 0.451±0.087b  | 2.698±0.212a |
|                                 | FA-80     | 0.251±0.090b              | 0.849±0.098c  | 0.350±0.055b     | 0.483±0.088a      | 0.446±0.058b  | 2.379±0.182b |
|                                 | IW        | 0.243±0.063b              | 0.854±0.125c  | 0.354±0.086b     | 0.404±0.075b      | 0.274±0.045c  | 2.129±0.155c |
|                                 | IA        | 0.249±0.026b              | 0.437±0.056d  | 0.334±0.065b     | 0.247±0.046e      | 0.229±0.015c  | 1.496±0.122e |
|                                 | IA-80     | 0.192±0.050c              | 0.459±0.056d  | 0.366±0.055b     | 0.290±0.058c      | 0.270±0.058c  | 1.577±0.155d |
| NH <sub>4</sub> <sup>+</sup> -N | FW        | 0.207±0.065b              | 0.894±0.202a  | 0.442±0.086a     | 0.390±0.089c      | 0.468±0.105a  | 2.401±0.122a |
|                                 | FA        | 0.257±0.078a              | 0.930±0.158a  | 0.343±0.086b     | 0.468±0.068b      | 0.379±0.062ab | 2.377±0.152a |
|                                 | FA-80     | 0.214±0.065b              | 0.671±0.102c  | 0.326±0.080b     | 0.504±0.112a      | 0.321±0.069b  | 2.036±0.088b |
|                                 | IW        | 0.205±0.058b              | 0.810±0.185b  | 0.329±0.102b     | 0.388±0.065c      | 0.226±0.068d  | 1.958±0.102c |
|                                 | IA        | 0.181±0.045c              | 0.355±0.087d  | 0.327±0.030b     | 0.188±0.026e      | 0.204±0.022d  | 1.255±0.158e |
|                                 | IA-80     | 0.166±0.026c              | 0.389±0.020d  | 0.320±0.056b     | 0.264±0.058d      | 0.219±0.090d  | 1.358±0.088d |
| NO <sub>3</sub> <sup>-</sup> -N | FW        | 0.018±0.002c              | 0.056±0.020c  | 0.054±0.012b     | 0.054±0.021b      | 0.049±0.012a  | 0.231±0.026b |
|                                 | FA        | 0.029±0.010b              | 0.075±0.026b  | 0.077±0.021a     | 0.069±0.021a      | 0.054±0.012a  | 0.304±0.030a |
|                                 | FA-80     | 0.051±0.015a              | 0.086±0.026a  | 0.045±0.012c     | 0.062±0.021a      | 0.056±0.010a  | 0.300±0.025a |
|                                 | IW        | 0.056±0.022a              | 0.068±0.021bc | 0.045±0.012c     | 0.026±0.006c      | 0.027±0.005b  | 0.222±0.030b |
|                                 | IA        | 0.062±0.022a              | 0.048±0.010d  | 0.028±0.010d     | 0.028±0.010c      | 0.033±0.010b  | 0.199±0.018c |
|                                 | IA-80     | 0.030±0.005b              | 0.062±0.026bc | 0.034±0.012d     | 0.025±0.010c      | 0.036±0.012b  | 0.187±0.020c |

<sup>1</sup> The letters in the table indicate the significant difference in different period of rice between the treatments (P < 0.05).
