# Supplementary material for: Nitrogen Loss and Migration in Rice Fields under Different Water and Fertilizer Modes
Source: MDPI journal article supplement (doi:10.3390/plants13050562), 2024-02-20
Supplement: s1 [file s1]

**Table S6** Precipitation distribution of rice at each growth stage

|                                          | <b>Regreening</b> | <b>Tillering</b> | <b>Jointing-<br/>booting</b> | <b>Hrading-<br/>flowering</b> | <b>Milky-<br/>ripping</b> | <b>Amount</b> |
|------------------------------------------|-------------------|------------------|------------------------------|-------------------------------|---------------------------|---------------|
| Precipitation<br>(mm)                    | 2.80              | 50.40            | 0.00                         | 30.70                         | 53.40                     | 137.30        |
| Average daily<br>precipitation<br>(mm/d) | 0.28              | 1.44             | 0.00                         | 1.28                          | 2.23                      | 1.20          |
| Precipitation<br>proportion (%)          | 2.04              | 36.71            | 0.00                         | 22.36                         | 38.89                     | /             |
