# Supplementary material for: Nitrogen Loss and Migration in Rice Fields under Different Water and Fertilizer Modes
Source: MDPI journal article supplement (doi:10.3390/plants13050562), 2024-02-20
Supplement: s1 [file s1]

**Table S5** Change of nitrogen concentration in soil vertical profile

| Nitrogen form                   | Deep | FW                          | FA             | FA-80           | IW             | IA             | IA-80           |
|---------------------------------|------|-----------------------------|----------------|-----------------|----------------|----------------|-----------------|
| TN                              | -18  | 0.637 ± 0.125c <sup>1</sup> | 0.799 ± 0.126b | 0.790 ± 0.118b  | 0.633 ± 0.142c | 0.835 ± 0.092a | 0.807 ± 0.188b  |
|                                 |      | 0.618 ± 0.085c              | 0.688 ± 0.102b | 0.678 ± 0.055b  | 0.623 ± 0.125c | 0.718 ± 0.118a | 0.701 ± 0.132ab |
|                                 | -36  | 0.629 ± 0.098a              | 0.526 ± 0.082c | 0.533 ± 0.062bc | 0.613 ± 0.075a | 0.549 ± 0.062b | 0.559 ± 0.080b  |
|                                 |      | 0.395 ± 0.083c              | 0.444 ± 0.103b | 0.467 ± 0.112a  | 0.388 ± 0.088c | 0.471 ± 0.088a | 0.458 ± 0.068ab |
|                                 | -56  | 0.384 ± 0.026a              | 0.392 ± 0.070a | 0.407 ± 0.088a  | 0.387 ± 0.036a | 0.400 ± 0.076a | 0.389 ± 0.085a  |
|                                 |      | 0.402 ± 0.045a              | 0.346 ± 0.026b | 0.353 ± 0.050b  | 0.393 ± 0.045a | 0.330 ± 0.042c | 0.322 ± 0.040c  |
| NH <sub>4</sub> <sup>+</sup> -N | -18  | 0.171 ± 0.021d              | 0.351 ± 0.030b | 0.367 ± 0.056b  | 0.206 ± 0.069c | 0.403 ± 0.062a | 0.380 ± 0.099a  |
|                                 |      | 0.169 ± 0.056d              | 0.262 ± 0.041a | 0.254 ± 0.026a  | 0.203 ± 0.036c | 0.268 ± 0.026a | 0.244 ± 0.026b  |
|                                 | -36  | 0.164 ± 0.042c              | 0.151 ± 0.026c | 0.163 ± 0.035c  | 0.199 ± 0.012b | 0.218 ± 0.035a | 0.210 ± 0.048a  |
|                                 |      |                             |                |                 |                |                |                 |
|                                 | -56  |                             |                |                 |                |                |                 |
|                                 |      |                             |                |                 |                |                |                 |
| NO <sub>3</sub> <sup>-</sup> -N | -18  | 0.171 ± 0.021d              | 0.351 ± 0.030b | 0.367 ± 0.056b  | 0.206 ± 0.069c | 0.403 ± 0.062a | 0.380 ± 0.099a  |
|                                 |      | 0.169 ± 0.056d              | 0.262 ± 0.041a | 0.254 ± 0.026a  | 0.203 ± 0.036c | 0.268 ± 0.026a | 0.244 ± 0.026b  |
|                                 | -36  | 0.164 ± 0.042c              | 0.151 ± 0.026c | 0.163 ± 0.035c  | 0.199 ± 0.012b | 0.218 ± 0.035a | 0.210 ± 0.048a  |
|                                 |      |                             |                |                 |                |                |                 |
|                                 | -56  |                             |                |                 |                |                |                 |
|                                 |      |                             |                |                 |                |                |                 |

<sup>1</sup> The letters in the table indicate the significant difference in different nitrogen form between the treatments (P < 0.05).
