# Supplementary material for: Nitrogen Loss and Migration in Rice Fields under Different Water and Fertilizer Modes
Source: MDPI journal article supplement (doi:10.3390/plants13050562), 2024-02-20
Supplement: s1 [file s1]

**Table S3.** Different treatment and irrigation displacement

| <b>Treatment</b>       | <b>FW</b>                       | <b>FA</b>           | <b>FA-80</b>       | <b>IW</b>          | <b>IA</b>          | <b>IA-80</b>       |
|------------------------|---------------------------------|---------------------|--------------------|--------------------|--------------------|--------------------|
| Irrigation of water    | 1387.43 <sup>1</sup><br>±73.46a | 1332.23<br>±21.85ab | 1281.52<br>±11.51b | 1182.02<br>±33.43c | 1158.69<br>±1.88cd | 1103.30<br>±35.12d |
| Surface water drainage | 0                               | 0                   | 0                  | 0                  | 0                  | 0                  |
| Groundwater drainage   | 250.33±4.87a                    | 259.77±8.88a        | 247.44<br>±14.19a  | 164.44<br>±15.55b  | 163.15±7.70b       | 158.44±8.88b       |

<sup>1</sup> The unit of fertilizer application is mm. The letters in the table indicate the significant difference between the treatments (P <0.05).
