# Supplementary material for: Nitrogen Loss and Migration in Rice Fields under Different Water and Fertilizer Modes
Source: Plants (Basel). 2024 Feb 20;13(5):562. doi: 10.3390/plants13050562 (PMC10935088; doi:10.3390/plants13050562)
Supplement: Supplementary file 1 [file plants-13-00562-s001.zip]

Archive with 8 entries (8 files):
- plants-2804640-Figure S1.jpg
- plants-2804640-Figure S2.jpg
- plants-2804640-Table S1.pdf
- plants-2804640-Table S2.pdf
- plants-2804640-Table S3.pdf
- plants-2804640-Table S4.pdf
- plants-2804640-Table S5.pdf
- plants-2804640-Table S6.pdf
